# Supplementary material
Source: PubMed Central journal article supplement (PMC7648370)

Supplemental Figures for:  
Pre-treatment blood parameters predict efficacy from immunotherapy agents in early phase clinical trials  
Carmen Criscitiello et al.

**Figure S1.** Boxplots display different levels of LDH at baseline according to the presence of visceral metastases (panel A) and previous line of therapy (panel B).

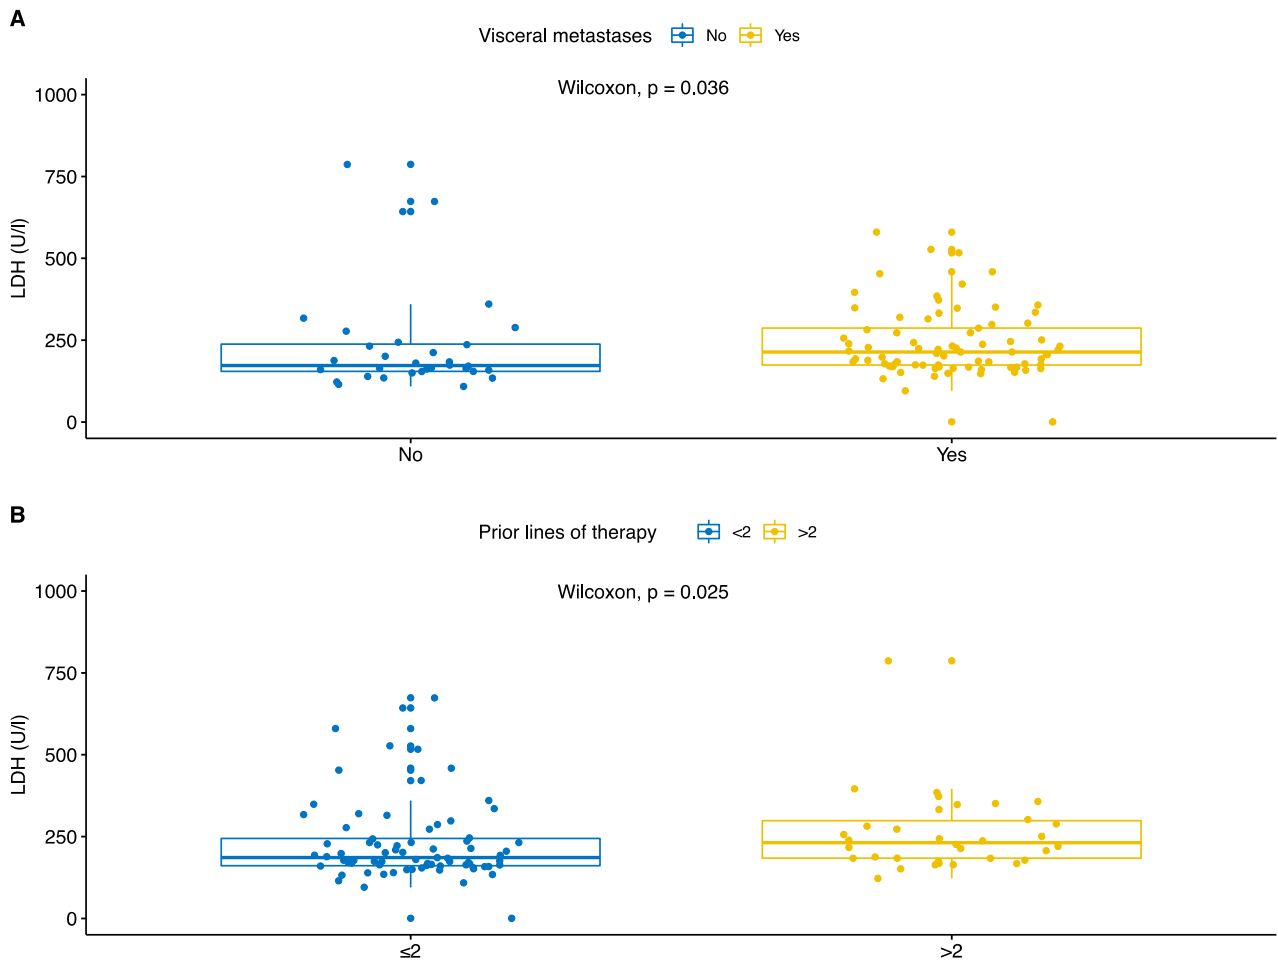

Supplemental Figures for:  
Pre-treatment blood parameters predict efficacy from immunotherapy agents in early phase clinical trials  
Carmen Criscitiello et al.

**Figure S2.** Overall response rate (ORR) and clinical benefit rate (CBR) in selected patients' subgroups. ORR according for ECOG performance status (panel A) and prior lines of therapy (panel B); CBR for age category (panel C) and LDH level (panel D).

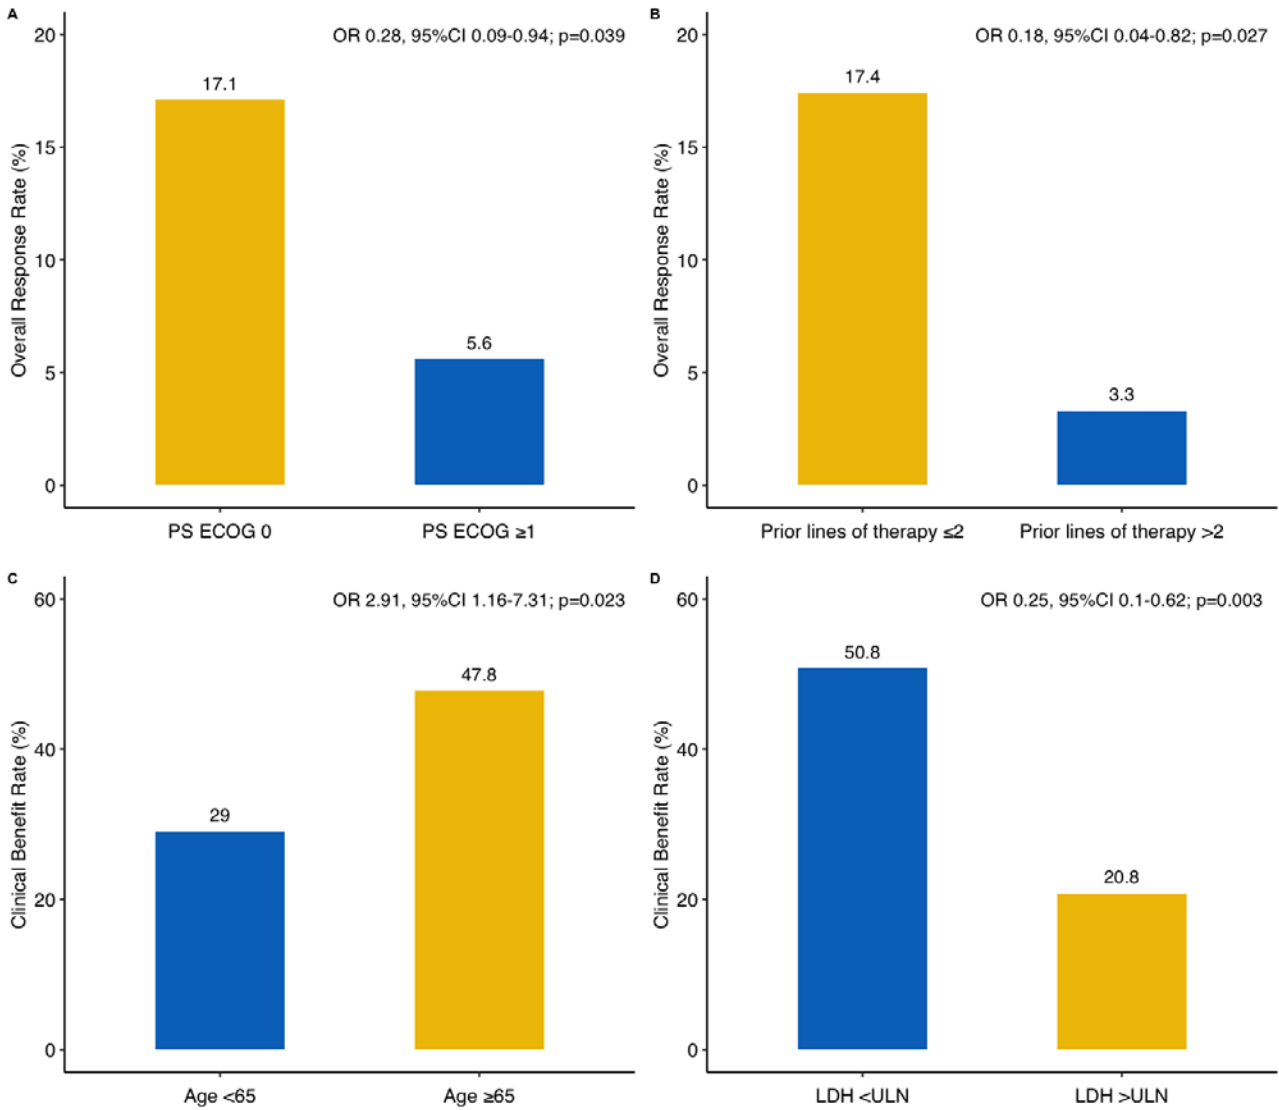

Supplemental Figures for:  
Pre-treatment blood parameters predict efficacy from immunotherapy agents in early phase clinical trials  
Carmen Criscitiello et al.

**Figure S3.** Overall response rate (ORR) and clinical benefit rate (CBR) for monotherapy and combination therapy according to risk score (panels A and B); ORR and CBR according to the risk score (panels C and D)

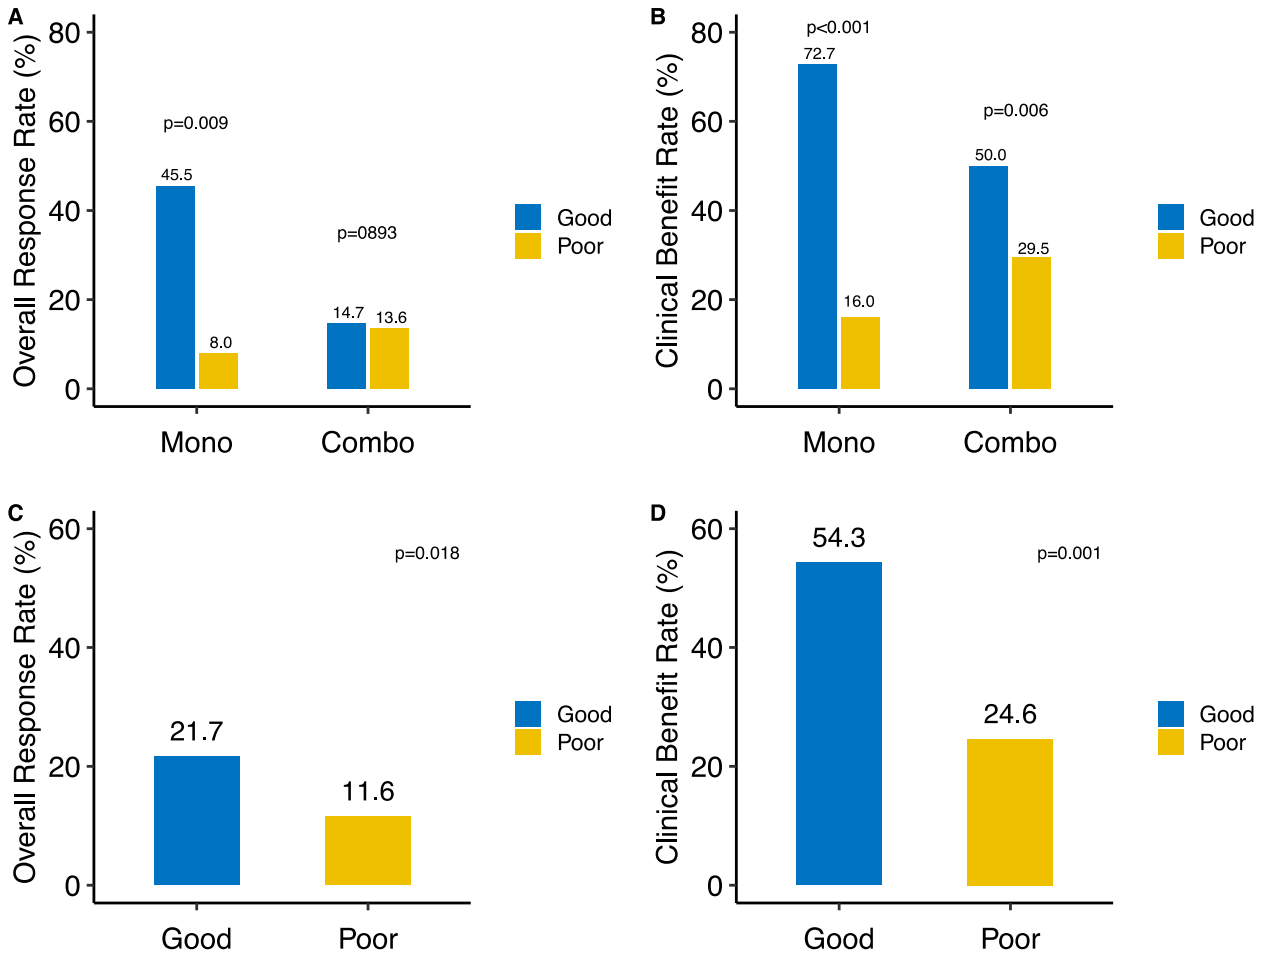

Supplement: ONCO-25-e1732-s001.pdf [file ONCO-25-e1732-s001.pdf]
